# Supplementary material for: Inhibition of mitochondrial fission activates glycogen synthesis to support cell survival in colon cancer
Source: PubMed Central journal article supplement (PMC10564897; doi:10.1038/s41419-023-06202-3), 2023-10-10

**Figure 1A**

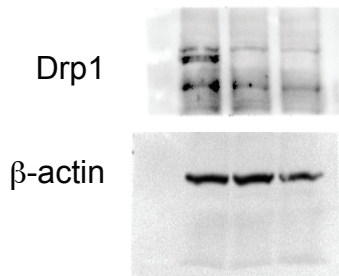

**Figure 2B**

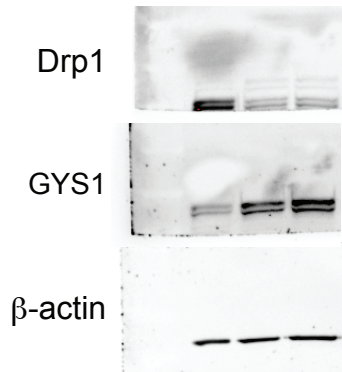

**Figure 2E**

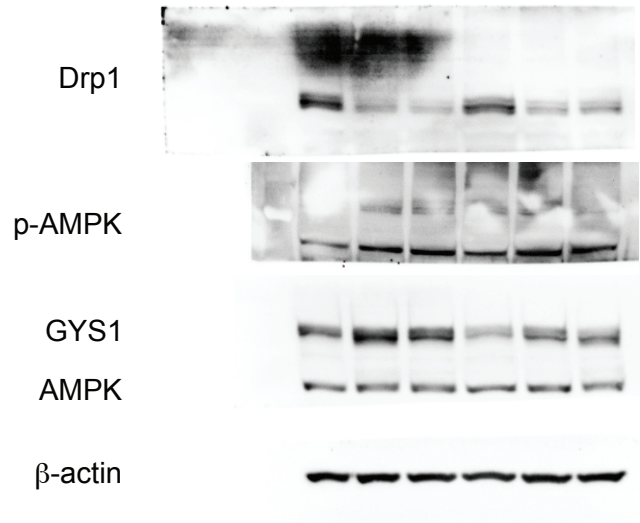

**Figure 3A**

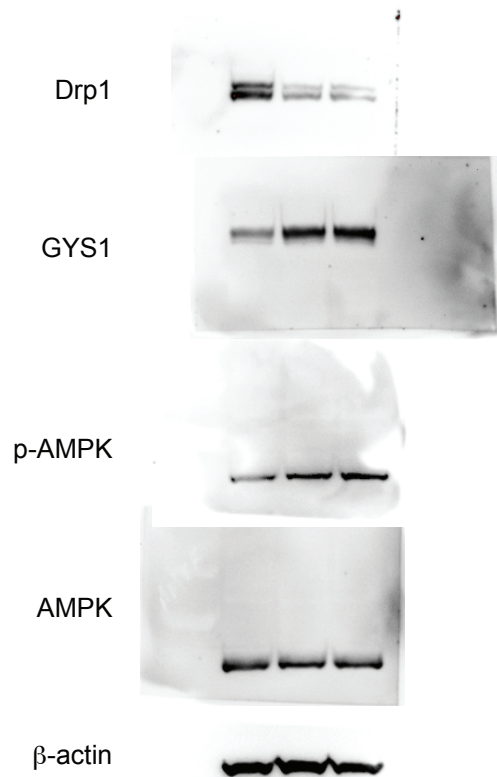

**Figure 3C**

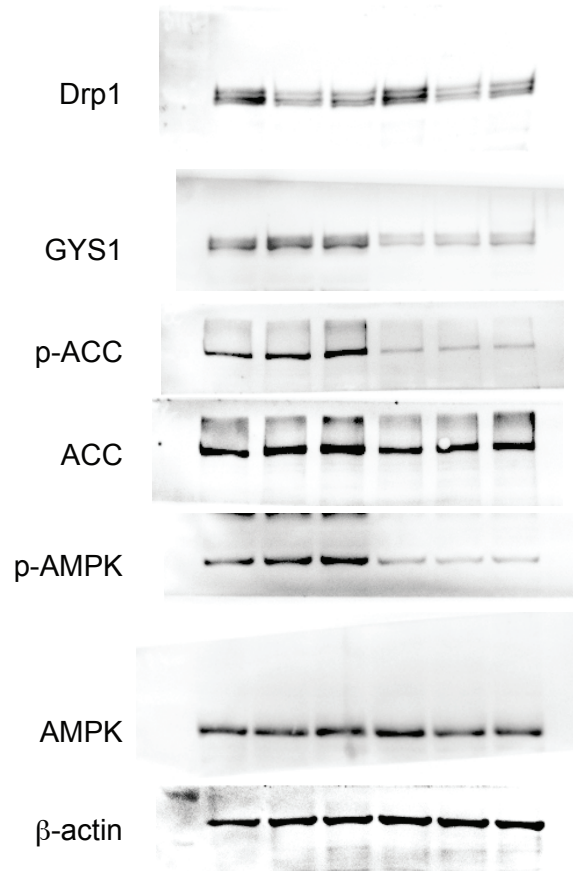

**Figure 4A**

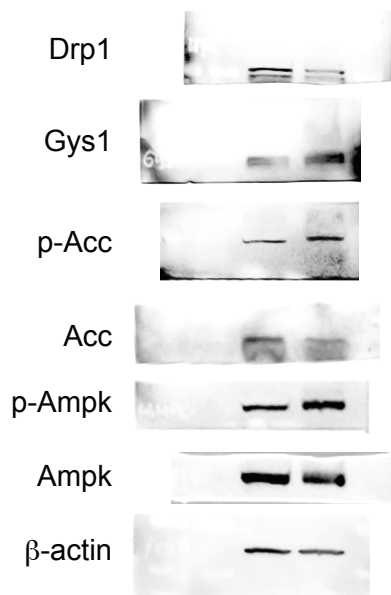

**Figure 5A**

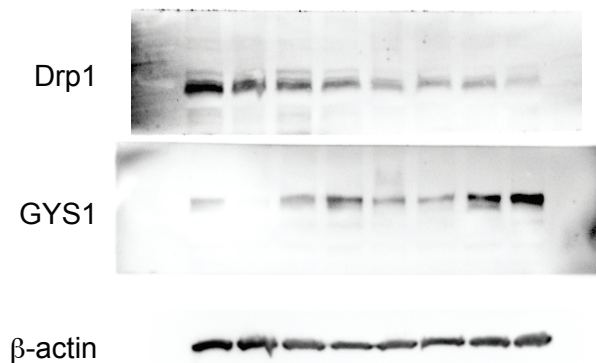

**Figure S1A**

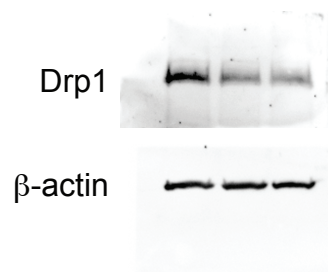

**Figure S2B**

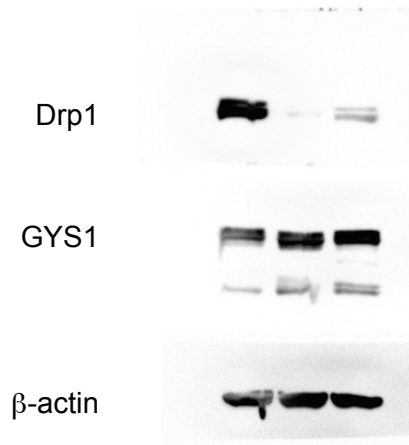

**Figure S3A**

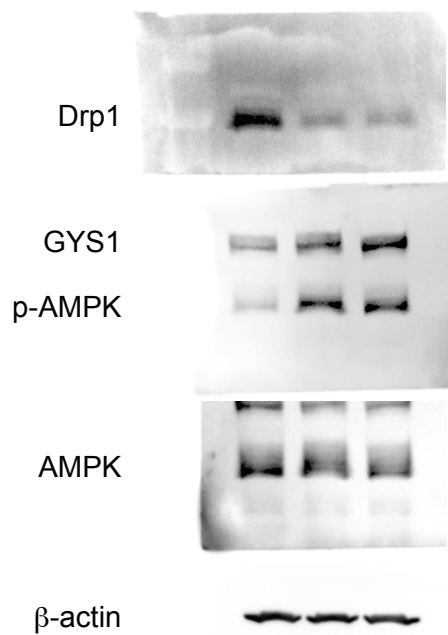

**Figure S3C**

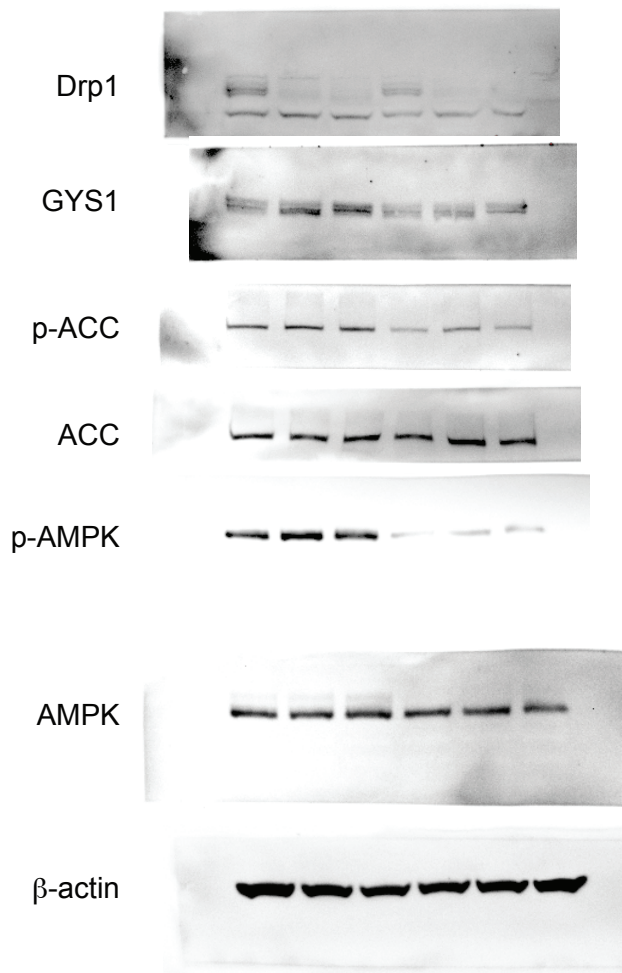

Supplement: 41419_2023_6202_MOESM2_ESM.pdf [file 41419_2023_6202_MOESM2_ESM.pdf]
